# Supplementary material for: Immunoinformatics Approach to Design Multi-Epitope- Subunit Vaccine against Bovine Ephemeral Fever Disease
Source: MDPI journal article supplement (doi:10.3390/vaccines9080925), 2021-08-19
Supplement: s1 [file s1]

**Figure S1.** Represents secondary structure of MEV-BEFV peptide as analysed through CFSSP: Chou and Fasman secondary structure prediction server.

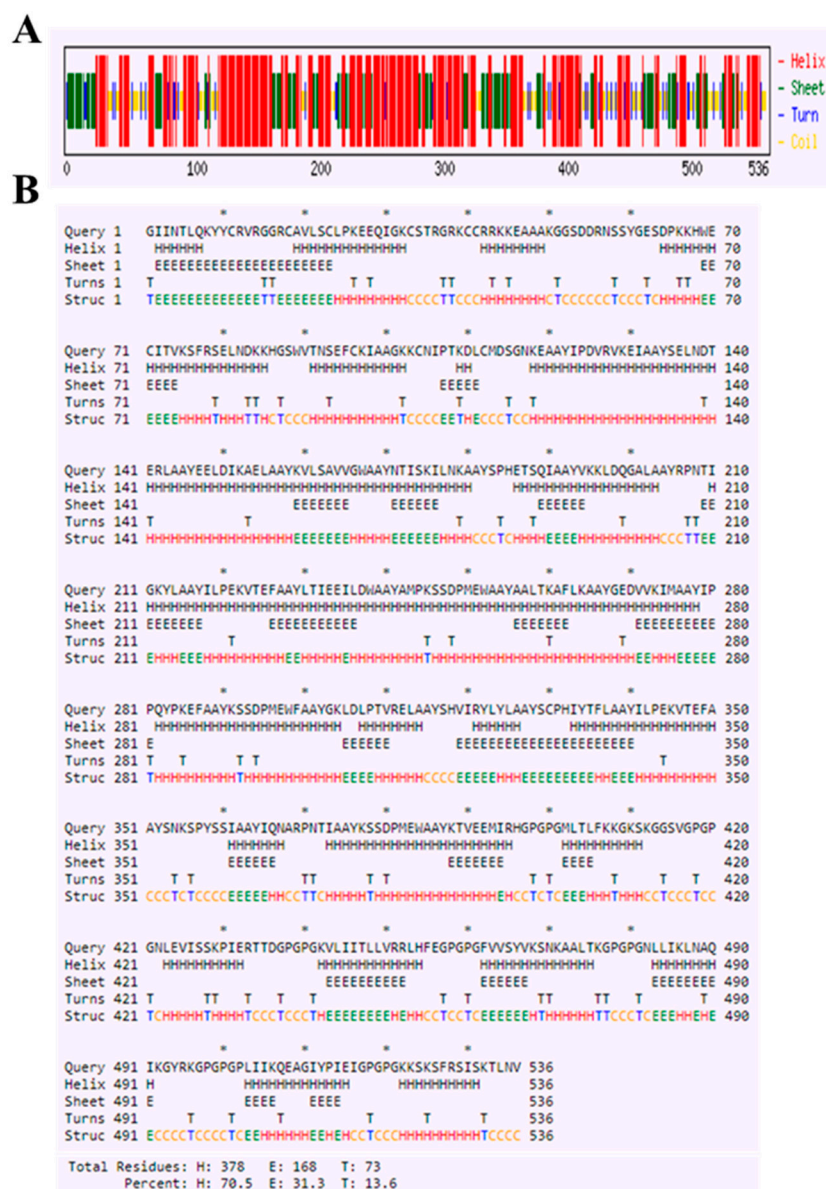

**Fig S2. Molecular Dynamics simulation. A.** Temperature graph at 300K **B.** Pressure (at) 1 bar pressure

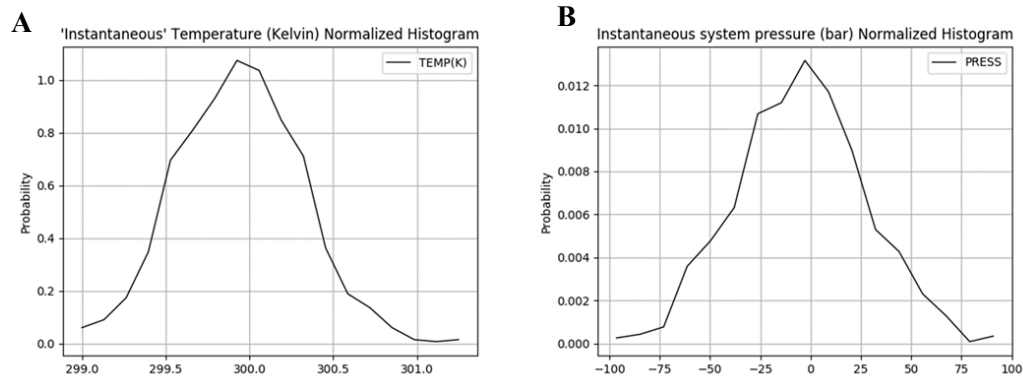

### Supplementary Tables

**Table S1.** Representing the list of all the BoLA- I and BoLA-II alleles (BoLA-DRB3 subtypes) explored during the process for epitope prediction

| S.no. | MHC-I alleles | MHC-II alleles  |
|-------|---------------|-----------------|
| 1     | BoLA-1:00901  | BoLA-DRB3*0101  |
| 2     | BoLA-1:00902  | BoLA-DRB3*0201  |
| 3     | BoLA-1:01901  | BoLA-DRB3*0301  |
| 4     | BoLA-1:02001  | BoLA-DRB3*03021 |
| 5     | BoLA-1:02101  | BoLA-DRB3*0303  |
| 6     | BoLA-1:02301  | BoLA-DRB3*0401  |
| 7     | BoLA-1:02801  | BoLA-DRB3*0501  |
| 8     | BoLA-1:02901  | BoLA-DRB3*0502  |
| 9     | BoLA-1:03101  | BoLA-DRB3*0503  |
| 10    | BoLA-1:03102  | BoLA-DRB3*0601  |
| 11    | BoLA-1:04201  | BoLA-DRB3*0701  |
| 12    | BoLA-1:04901  | BoLA-DRB3*0801  |
| 13    | BoLA-1:06101  | BoLA-DRB3*0901  |
| 14    | BoLA-1:06701  | BoLA-DRB3*0902  |
| 15    | BoLA-1:07401  | BoLA-DRB3*1001  |
| 16    | BoLA-2:00501  | BoLA-DRB3*1002  |

|    |              |                 |
|----|--------------|-----------------|
| 17 | BoLA-2:00601 | BoLA-DRB3*1101  |
| 18 | BoLA-2:00602 | BoLA-DRB3*1103  |
| 19 | BoLA-2:00801 | BoLA-DRB3*1201  |
| 20 | BoLA-2:00802 | BoLA-DRB3*1301  |
| 21 | BoLA-2:01201 | BoLA-DRB3*14011 |
| 22 | BoLA-2:01601 | BoLA-DRB3*14012 |
| 23 | BoLA-2:01602 | BoLA-DRB3*1501  |
| 24 | BoLA-2:01801 | BoLA-DRB3*1601  |
| 25 | BoLA-2:01802 | BoLA-DRB3*1602  |
| 26 | BoLA-2:02201 | BoLA-DRB3*1701  |
| 27 | BoLA-2:02501 | BoLA-DRB3*1702  |
| 28 | BoLA-2:02601 | BoLA-DRB3*1703  |
| 29 | BoLA-2:02602 | BoLA-DRB3*1801  |
| 30 | BoLA-2:02603 | BoLA-DRB3*1802  |
| 31 | BoLA-2:03001 | BoLA-DRB3*1901  |
| 32 | BoLA-2:03202 | BoLA-DRB3*1902  |
| 33 | BoLA-2:04301 | BoLA-DRB3*1903  |
| 34 | BoLA-2:04401 | BoLA-DRB3*20011 |
| 35 | BoLA-2:04402 | BoLA-DRB3*20012 |
| 36 | BoLA-2:04501 | BoLA-DRB3*2002  |
| 37 | BoLA-2:04601 | BoLA-DRB3*2003  |
| 38 | BoLA-2:04701 | BoLA-DRB3*2004  |
| 39 | BoLA-2:04801 | BoLA-DRB3*2005  |
| 40 | BoLA-2:05401 | BoLA-DRB3*2101  |
| 41 | BoLA-2:05501 | BoLA-DRB3*2201  |
| 42 | BoLA-2:05601 | BoLA-DRB3*2202  |
| 43 | BoLA-2:05701 | BoLA-DRB3*2301  |
| 44 | BoLA-2:06001 | BoLA-DRB3*2401  |
| 45 | BoLA-2:06201 | BoLA-DRB3*2402  |
| 46 | BoLA-2:06901 | BoLA-DRB3*25011 |
| 47 | BoLA-2:07001 | BoLA-DRB3*25012 |
| 48 | BoLA-2:07101 | BoLA-DRB3*2601  |
| 49 | BoLA-3:00101 | BoLA-DRB3*2702  |
| 50 | BoLA-3:00102 | BoLA-DRB3*2703  |
| 51 | BoLA-3:00103 | BoLA-DRB3*2704  |

|    |              |                 |
|----|--------------|-----------------|
| 52 | BoLA-3:00201 | BoLA-DRB3*2705  |
| 53 | BoLA-3:00401 | BoLA-DRB3*2707  |
| 54 | BoLA-3:00402 | BoLA-DRB3*2708  |
| 55 | BoLA-3:00403 | BoLA-DRB3*2709  |
| 56 | BoLA-3:01001 | BoLA-DRB3*2710  |
| 57 | BoLA-3:01101 | BoLA-DRB3*2801  |
| 58 | BoLA-3:01701 | BoLA-DRB3*2901  |
| 59 | BoLA-3:01702 | BoLA-DRB3*3001  |
| 60 | BoLA-3:01703 | BoLA-DRB3*3002  |
| 61 | BoLA-3:02701 | BoLA-DRB3*3101  |
| 62 | BoLA-3:02702 | BoLA-DRB3*3103  |
| 63 | BoLA-3:03501 | BoLA-DRB3*3201  |
| 64 | BoLA-3:03601 | BoLA-DRB3*3202  |
| 65 | BoLA-3:03701 | BoLA-DRB3*3203  |
| 66 | BoLA-3:03801 | BoLA-DRB3*3301  |
| 67 | BoLA-3:05001 | BoLA-DRB3*3401  |
| 68 | BoLA-3:05002 | BoLA-DRB3*3402  |
| 69 | BoLA-3:05101 | BoLA-DRB3*3501  |
| 70 | BoLA-3:05201 | BoLA-DRB3*3601  |
| 71 | BoLA-3:05301 | BoLA-DRB3*4001  |
| 72 | BoLA-3:05801 | BoLA-DRB3*4101  |
| 73 | BoLA-3:05901 | BoLA-DRB3*4201  |
| 74 | BoLA-3:06501 | BoLA-DRB3*4301  |
| 75 | BoLA-3:06601 | BoLA-DRB3*4302  |
| 76 | BoLA-3:06602 | BoLA-DRB3*4303  |
| 77 | BoLA-3:06801 | BoLA-DRB3*4401  |
| 78 | BoLA-3:07301 | BoLA-DRB3*4501  |
| 79 | BoLA-4:02401 | BoLA-DRB3*46011 |
| 80 | BoLA-4:02402 | BoLA-DRB3*4701  |
| 81 | BoLA-4:06301 | BoLA-DRB3*4802  |
| 82 | BoLA-5:00301 | BoLA-DRB3*5701  |
| 83 | BoLA-5:03901 | BoLA-DRB3*5702  |
| 84 | BoLA-5:06401 | BoLA-DRB3*5801  |
| 85 | BoLA-5:07201 | BoLA-DRB3*5901  |
| 86 | BoLA-6:01301 | BoLA-DRB3*6001  |

|     |              |                 |
|-----|--------------|-----------------|
| 87  | BoLA-6:01302 | BoLA-DRB3*6101  |
| 88  | BoLA-6:01401 | BoLA-DRB3*6201  |
| 89  | BoLA-6:01402 | BoLA-DRB3*6301  |
| 90  | BoLA-6:01501 | BoLA-DRB3*6401  |
| 91  | BoLA-6:01502 | BoLA-DRB3*6402  |
| 92  | BoLA-6:03401 | BoLA-DRB3*6501  |
| 93  | BoLA-6:04001 | BoLA-DRB3*6601  |
| 94  | BoLA-6:04101 | BoLA-DRB3*0101  |
| 95  | BoLA-AW10    | BoLA-DRB3*0201  |
| 96  | BoLA-D18.4   | BoLA-DRB3*0301  |
| 97  | BoLA-HD6     | BoLA-DRB3*03021 |
| 98  | BoLA-JSP.1   | BoLA-DRB3*0303  |
| 99  | BoLA-T2a     | BoLA-DRB3*0401  |
| 100 | BoLA-T2b     | BoLA-DRB3*0501  |
| 101 | BoLA-T2c     | BoLA-DRB3*0502  |
| 102 | BoLA-T5      | BoLA-DRB3*0503  |
| 103 | BoLA-T7      | BoLA-DRB3*0601  |
| 104 | BoLA-amani.1 |                 |
| 105 | BoLA-gb1.7   |                 |

**Table S2.** Epitope conservancy for all the prioritised predicted epitopes of the MEV-BEFV

| Epitope sequence      | Epitope length | Epitope type | Percent of protein sequence matches at identity $\geq 80\%$ | Minimum identity | Maximum identity |
|-----------------------|----------------|--------------|-------------------------------------------------------------|------------------|------------------|
| <b>Matrix protein</b> |                |              |                                                             |                  |                  |
| MLTLFKKGKSKGGSV       | 15             | HTL          | <b>50.00% (4/8)</b>                                         | 93.33%           | 100.00%          |
| NLEVISSKPIERTTD       | 15             | HTL          | <b>87.50% (7/8)</b>                                         | 93.33%           | 100.00%          |
| GGSVDDRNSSYGESDP      | 16             | BCL          | <b>100.00% (8/8)</b>                                        | 93.75%           | 100.00%          |
| <b>Glycoprotein</b>   |                |              |                                                             |                  |                  |
| HWECITVKSFRSELND      | 16             | BCL          | <b>50.00% (4/8)</b>                                         | 93.75%           | 100.00%          |
| IPDVRVKEI             | 9              | CTL          | <b>87.50% (7/8)</b>                                         | 88.89%           | 100.00%          |
| EELDIKAEI             | 9              | CTL          | <b>100.00% (8/8)</b>                                        | 100.00%          | 100.00%          |
| KVLSAVVGW             | 9              | CTL          | <b>100.00% (8/8)</b>                                        | 100.00%          | 100.00%          |
| NTISKILNK             | 9              | CTL          | <b>100.00% (8/8)</b>                                        | 100.00%          | 100.00%          |
| SPHETSQI              | 8              | CTL          | <b>87.50% (7/8)</b>                                         | 75.00%           | 100.00%          |
| VKKLDQGAL             | 9              | CTL          | <b>100.00% (8/8)</b>                                        | 100.00%          | 100.00%          |
| KVLIITLLVRRHLFE       | 15             | HTL          | <b>37.50% (3/8)</b>                                         | 66.67%           | 100.00%          |
| <b>Nucleoprotein</b>  |                |              |                                                             |                  |                  |
| RPNTIGKYL             | 9              | CTL          | <b>100.00% (8/8)</b>                                        | 100.00%          | 100.00%          |
| ILPEKVTEF             | 9              | CTL          | <b>100.00% (8/8)</b>                                        | 100.00%          | 100.00%          |
| LTIEEILDW             | 9              | CTL          | <b>100.00% (8/8)</b>                                        | 88.89%           | 100.00%          |
| AMPKSSDPMEW           | 11             | CTL          | <b>100.00% (8/8)</b>                                        | 100.00%          | 100.00%          |
| AALTKAFLK             | 9              | CTL          | <b>100.00% (8/8)</b>                                        | 100.00%          | 100.00%          |
| GEDVVKIM              | 8              | CTL          | <b>100.00% (8/8)</b>                                        | 100.00%          | 100.00%          |
| IPPQYPKEF             | 9              | CTL          | <b>100.00% (8/8)</b>                                        | 100.00%          | 100.00%          |
| KSSDPMEWF             | 9              | CTL          | <b>100.00% (8/8)</b>                                        | 100.00%          | 100.00%          |
| GKLDLPTVREL           | 11             | CTL          | <b>100.00% (8/8)</b>                                        | 90.91%           | 100.00%          |
| SHVIRYLYL             | 9              | CTL          | <b>100.00% (8/8)</b>                                        | 100.00%          | 100.00%          |
| SCPHIYTFL             | 9              | CTL          | <b>100.00% (8/8)</b>                                        | 100.00%          | 100.00%          |
| ILPEKVTEF             | 9              | CTL          | <b>100.00% (8/8)</b>                                        | 100.00%          | 100.00%          |
| SNKSPYSSI             | 9              | CTL          | <b>100.00% (8/8)</b>                                        | 100.00%          | 100.00%          |
| IQNARPNTI             | 9              | CTL          | <b>100.00% (8/8)</b>                                        | 100.00%          | 100.00%          |
| IQNARPNTI             | 9              | CTL          | <b>100.00% (8/8)</b>                                        | 100.00%          | 100.00%          |
| HGSWVTNSEFCKIAAG      | 16             | BCL          | <b>100.00% (8/8)</b>                                        | 100.00%          | 100.00%          |
| FVVSYSVKSNAALTK       | 15             | HTL          | <b>100.00% (8/8)</b>                                        | 100.00%          | 100.00%          |
| NLLIKLNAQIKGYRK       | 15             | HTL          | <b>100.00% (8/8)</b>                                        | 100.00%          | 100.00%          |
| <b>Phosphoprotein</b> |                |              |                                                             |                  |                  |
| KTVEEMIRH             | 9              | CTL          | <b>87.50% (7/8)</b>                                         | 77.78%           | 100.00%          |
| CNIPTKDLCDMSGNKE      | 16             | BCL          | <b>37.50% (3/8)</b>                                         | 50.00%           | 100.00%          |
| PLIIKQEAGIYPIEI       | 15             | HTL          | <b>100.00% (8/8)</b>                                        | 80.00%           | 100.00%          |
| KKSKSFRSISKTLNV       | 15             | HTL          | <b>87.50% (7/8)</b>                                         | 73.33%           | 100.00%          |
